# Supplementary material for: Microwave synthesis of high-flux NaY zeolite membranes in fluoride media
Source: Royal Society of Chemistry journal article supplement (doi:10.1039/c5ra13760h), 2015-01-01
Supplement: c5ra13760h1.pdf [file c5ra13760h1.pdf]

## Supporting Information

For

### Microwave Synthesis of High-flux NaY Zeolite Membranes in Fluoride

Media

Na Hu<sup>a</sup>, Yihong Zheng<sup>a</sup>, Zhen Yang<sup>a</sup>, Rongfei Zhou<sup>\*a,b</sup>, Xiangshu Chen<sup>\*a</sup>

<sup>a</sup> Department of Chemistry and Chemical Engineering, Jiangxi Normal University,  
Nanchang, P. R. China, 330022

<sup>b</sup> State Key Laboratory of Material-oriented Chemical Engineering, Department of  
Chemistry and Chemical Engineering, Nanjing Tech University, Nanjing, P. R. China,  
210009

E-mail: [rf-zhou@njtech.edu.cn](mailto:rf-zhou@njtech.edu.cn) (R.F. Zhou); Phone: +86-25-8317-2239, Fax: +86-25-  
8317-2261.

E-mail: [cxs66cn@jxnu.edu.cn](mailto:cxs66cn@jxnu.edu.cn) (X.S. Chen); Phone: +86-791-8812-0533, Fax: +86-  
791-8812-0843.

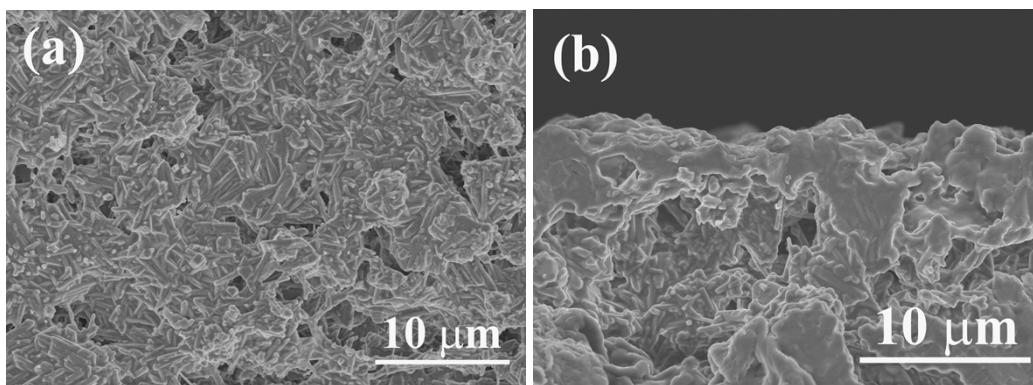

Fig. S1 SEM images of (a) surface and (b) cross section of the mullite support.

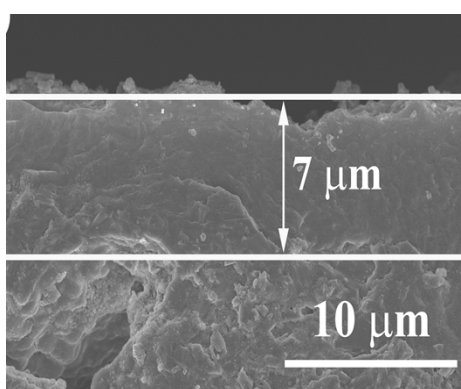

Fig. S2 Cross-sectional SEM images of NaY zeolite membrane prepared for 7 h.

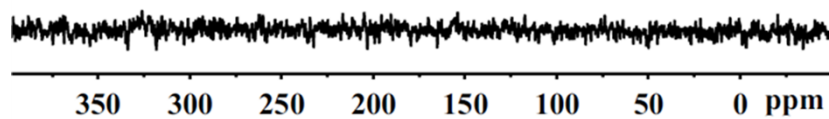

Fig. S3 <sup>19</sup>F MAS NMR spectra of NaY crystals collected from MH membranes in fluoride media.

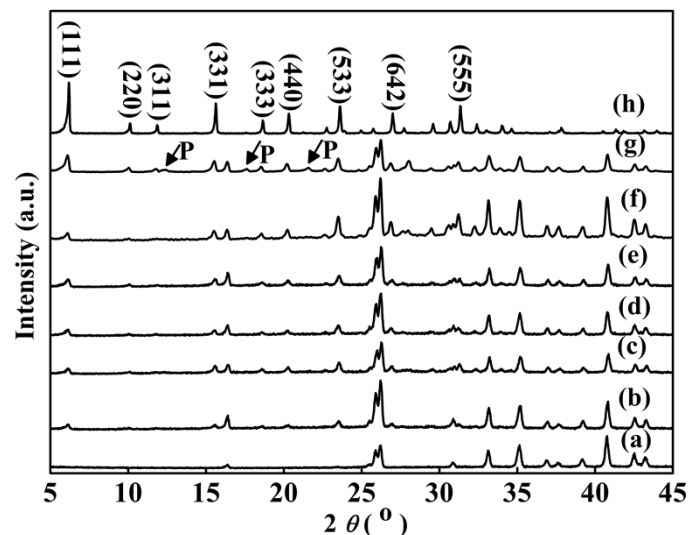

Fig. S4 XRD patterns of (a) mullite support and zeolite membranes prepared by microwave heating at 373 K for (b) 3.5 h, (c) 4.5 h, (d) 5.5 h, (e) 6.5 h, (f) 8 h and (g) 9 h and (h) NaY zeolite powder.

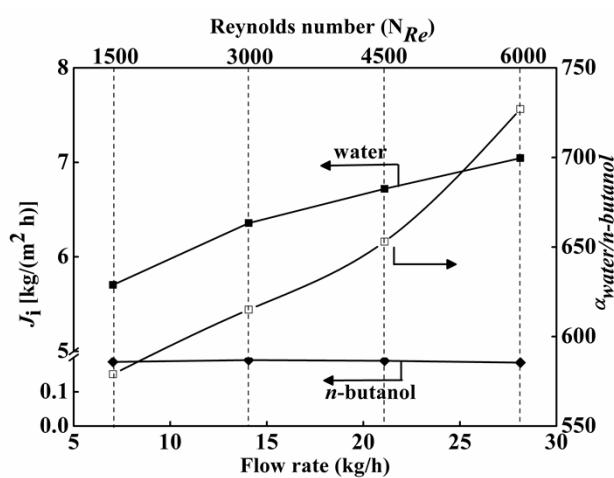

Fig. S5 VP performance of MH membrane (M4) as a function of the feed flow rate for 95 wt.% *n*-butanol aqueous solution at 383 K. Closed keys: the partial flux of water or alcohol; open keys: the water/alcohol separation factor.
